# Supplementary material for: Maternal genomic profile, gestational diabetes control, and Mediterranean diet to prevent low birth weight
Source: PubMed Central journal article supplement (PMC11648256; doi:10.1016/j.isci.2024.111376), 2024-11-13
Supplement: mmc1.pdf [file mmc1.pdf]

## **Supplemental information**

### **Maternal genomic profile, gestational diabetes control, and Mediterranean diet to prevent low birth weight**

**Ana M. Ramos-Levi, Rocío Martín O'Connor, Ana Barabash, Maria Paz de Miguel, Angel Diaz-Perez, Clara Marcuello, Cristina Familiar, Inmaculada Moraga, Maria Arnoriaga-Rodriguez, Johanna Valerio, Laura del Valle, Veronica Melero, Mirella Zulueta, Leire Mendizabal, María Jose Torrejon, Miguel Angel Rubio, Pilar Matia-Martín, and Alfonso Calle-Pascual**
